# Supplementary material for: Metallomacrocycle or coordination polymer: Spacer-directed self-assembly of transition-metal complexes based on flexible bis(benzotriazole) ligands
Source: Royal Society of Chemistry journal article supplement (doi:10.1039/c0ce00847h), 2011-01-01
Supplement: c0ce00847h.pdf [file c0ce00847h.pdf]

Electronic Supplementary Information

**Metallomacrocyclic or coordination polymer:  
Spacer-directed self-assembly of transition-metal complexes  
based on flexible bis(benzotriazole) ligands**

Xiao-Liang Tang, Wei Dou, Ji-an Zhou, Guo-Lin Zhang, Wei-Sheng Liu,\* Li-Zi  
Yang and Yong-Liang Shao

*Key Laboratory of Nonferrous Metals Chemistry and Resources Utilization of Gansu  
Province and State Key Laboratory of Applied Organic Chemistry, College of  
Chemistry and Chemical Engineering, Lanzhou University, Lanzhou, 730000, China.*

\* Corresponding author : E-mail: liuws@lzu.edu.cn

Fax: +86-931-8912582; Tel: +86-931-8915151;

## Contents

**Table S1** Selected bond lengths (Å), angles (°) and weak interaction for complex **1**;

**Table S2** Selected bond lengths (Å), angles (°) and weak interaction for complex **2**;

**Table S3** Selected bond lengths (Å), angles (°) and weak interaction for complex **3**;

**Table S4** Selected bond lengths (Å), angles (°) and weak interaction for complex **4**;

**Table S5** Selected bond lengths (Å), angles (°) and weak interaction for complex **5**;

**Table S6** Selected bond lengths (Å), angles (°) and weak interaction for complex **6**;

**Fig. S1** IR of the ligands **L<sup>1</sup>**, **L<sup>2</sup>** and **L<sup>3</sup>**;

**Fig. S2** IR of the complexes **1–6**.

**Table S1** Selected bond lengths (Å), angles (°) and weak interaction for complex **1**

|                                                |                          |                              |                             |            |
|------------------------------------------------|--------------------------|------------------------------|-----------------------------|------------|
| Ag(1)-O(1)                                     | 2.578(3)                 | Ag(1)-N(8)                   | 2.553(4)                    |            |
| Ag(1)-N(1)                                     | 2.247(3)                 | Ag(1)-N(4) <sup>i</sup>      | 2.213(3)                    |            |
| O(1)-Ag(1)-N(1)                                | 81.42(10)                | N(1)-Ag(1)-N(8)              | 91.61(14)                   |            |
| O(1)-Ag(1)-N(8)                                | 136.75(18)               | N(1)-Ag(1)-N(4) <sup>i</sup> | 151.17(11)                  |            |
| O(1)-Ag(1)-N(4) <sup>i</sup>                   | 107.84(10)               | N(8)-Ag(1)-N(4) <sup>i</sup> | 98.65(15)                   |            |
| N(3)-C(7)-C(8)-N(6)                            |                          | -61.6(4)                     |                             |            |
| D-H...A                                        | d(D-H)                   | d(H...A)                     | d(D...A)                    | ∠(D-H...A) |
| C(8)-H(8A)...O(1) <sup>ii</sup>                | 0.97                     | 2.38                         | 3.307(5)                    | 160        |
| C(8)-H(8B)...O(3) <sup>iii</sup>               | 0.97                     | 2.37                         | 3.292(5)                    | 158        |
| C(15)-H(15C)...N(5) <sup>iv</sup>              | 0.96                     | 2.61                         | 3.353(6)                    | 134        |
| $\pi \cdots \pi$ Interactions □ Face-to-Face □ |                          |                              |                             |            |
| Cg(a)-Cg(b)                                    | dihedral angle (a,b) (°) |                              | Ring Centroids Distance (Å) |            |
| Cg(1)-Cg(1) <sup>v</sup>                       | 0                        |                              | 3.5396(17)                  |            |
| Cg(1)-Cg(2) <sup>v</sup>                       | 0.99                     |                              | 3.6840(19)                  |            |

Symmetry codes: i) x, -1+y, z; ii) 2-x, 2-y, 2-z; iii) 1+x, 1+y, z; iv) 2-x, 2-y, 1-z; v) 2-x, 3-y, 2-z; Ring Cg(1): N(4)-N(5)-N(6)-C(14)-C(9); Ring Cg(2): C(9)-C(10)-C(11)-C(12)-C(13)-C(14).

**Table S2** Selected bond lengths (Å), angles (°) and weak interaction for complex **2**

|                                                |          |                                                    |           |            |
|------------------------------------------------|----------|----------------------------------------------------|-----------|------------|
| Ag(1)-N(1)                                     | 2.243(5) | Ag(1)-N(1) <sup>ii</sup>                           | 2.243(9)  |            |
| Ag(1)-N(1) <sup>i</sup>                        | 2.243(8) | Ag(1)-Ag(1) <sup>iii</sup>                         | 3.186(1)  |            |
| N(1)-Ag(1)-N(1) <sup>i</sup>                   | 120.0(3) | N(1)-Ag(1)-Ag(1) <sup>iii</sup>                    | 88.95(13) |            |
| N(1)-Ag(1)-N(1) <sup>ii</sup>                  | 120.0(2) | N(1) <sup>i</sup> -Ag(1)-Ag(1) <sup>iii</sup>      | 88.95(13) |            |
| N(1) <sup>i</sup> -Ag(1)-N(4) <sup>ii</sup>    | 120.0(3) | N(1) <sup>ii</sup> -Ag(1)-<br>Ag(1) <sup>iii</sup> | 88.95(13) |            |
| N(3)-C(7)-C(8)-O(1)                            |          | -68.1(1)                                           |           |            |
| D-H...A                                        | d(D-H)   | d(H...A)                                           | d(D...A)  | ∠(D-H...A) |
| C(3)-H(3)...N(2) <sup>i</sup>                  | 0.93     | 2.59                                               | 3.491(11) | 163        |
| C(6)-H(6)...O(2) <sup>iv</sup>                 | 0.93     | 2.36                                               | 3.219(10) | 153        |
| C(7)-H(7A)...O(2) <sup>v</sup>                 | 0.97     | 2.57                                               | 3.214(9)  | 124        |
| C(8)-H(8B)...O(2) <sup>v</sup>                 | 0.97     | 2.45                                               | 2.947(13) | 111        |
| $\pi \cdots \pi$ Interactions □ Face-to-Face □ |          |                                                    |           |            |

---

| Cg(a)–Cg(b)               | dihedral angle (a,b) (°) | Ring Centroids Distance (Å) |
|---------------------------|--------------------------|-----------------------------|
| Cg(1)–Cg(2) <sup>vi</sup> | 10.23                    | 3.968(4)                    |
| Cg(2)–Cg(2) <sup>vi</sup> | 11.20                    | 3.663(4)                    |

---

Symmetry codes: i) 1-y, 1+x-y, z; ii) -x+y, 1-x, z; iii) -1/3+y, 1/3+x, 5/6-z; iv) 1+x-y, 1+x, 1-z; v) 1-x, 2-y, 1-z; vi) 2/3-x, 1/3-x+y, 5/6-z; Ring Cg(1): N(1)–N(2)–N(3)–C(1)–C(2); Cg(2): C(1)–C(2)–C(3)–C(4)–C(5)–C(6).

**Table S3** Selected bond lengths (Å), angles (°) and weak interaction for complex 3

|                                                                                                                                                                                                                                            |                          |                                             |                             |            |
|--------------------------------------------------------------------------------------------------------------------------------------------------------------------------------------------------------------------------------------------|--------------------------|---------------------------------------------|-----------------------------|------------|
| Ag(1)-O(3)                                                                                                                                                                                                                                 | 2.424(2)                 | Ag(1)-O(3) <sup>i</sup>                     | 2.590(2)                    |            |
| Ag(1)-N(1)                                                                                                                                                                                                                                 | 2.199(2)                 | Ag(1)-N(6) <sup>ii</sup>                    | 2.217(2)                    |            |
| O(3)-Ag(1)-N(1)                                                                                                                                                                                                                            | 112.18(7)                | N(1)-Ag(1)-O(3) <sup>i</sup>                | 105.78(7)                   |            |
| O(3)-Ag(1)-O(3) <sup>i</sup>                                                                                                                                                                                                               | 75.99(7)                 | N(1)-Ag(1)-N(6) <sup>ii</sup>               | 134.41(7)                   |            |
| O(3)-Ag(1)-N(6) <sup>ii</sup>                                                                                                                                                                                                              | 109.14(7)                | O(3) <sup>i</sup> -Ag(1)-N(6) <sup>ii</sup> | 102.05(7)                   |            |
| Ag(1)-O(3)-Ag(1) <sup>i</sup>                                                                                                                                                                                                              | 104.01(7)                |                                             |                             |            |
| N(3)-C(7)-C(8)-O(1)                                                                                                                                                                                                                        |                          |                                             | -67.5(3)                    |            |
| O(2)-C(11)-C(12)-N(4)                                                                                                                                                                                                                      |                          |                                             | -62.8(3)                    |            |
| D-H...A                                                                                                                                                                                                                                    | d(D-H)                   | d(H...A)                                    | d(D...A)                    | ∠(D-H...A) |
| C(8)-H(8B)...O(2)                                                                                                                                                                                                                          | 0.97                     | 2.36                                        | 3.016(3)                    | 125        |
| C(12)-H(12B)...O(3) <sup>iii</sup>                                                                                                                                                                                                         | 0.97                     | 2.54                                        | 3.447(3)                    | 156        |
| C(14)-H(14)...O(5) <sup>iii</sup>                                                                                                                                                                                                          | 0.93                     | 2.57                                        | 3.499(4)                    | 176        |
| π...π Interactions □Face-to-Face□                                                                                                                                                                                                          |                          |                                             |                             |            |
| Cg(a)-Cg(b)                                                                                                                                                                                                                                | dihedral angle (a,b) (°) |                                             | Ring Centroids Distance (Å) |            |
| Cg(1)-Cg(1) <sup>iv</sup>                                                                                                                                                                                                                  | 0                        |                                             | 3.5487(18)                  |            |
| Cg(1)-Cg(2) <sup>iv</sup>                                                                                                                                                                                                                  | 0.96                     |                                             | 3.7593(19)                  |            |
| Cg(2)-Cg(3) <sup>v</sup>                                                                                                                                                                                                                   | 25.87                    |                                             | 3.991(2)                    |            |
| Symmetry codes: i) -1-x, 2-y, 2-z; ii) -x, 2-y, 2-z; iii) -x, 1-y, 2-z; iv) 1-x, 1-y, 2-z; v) -x, -1/2+y, 3/2-z; Ring Cg(1): N(4)-N(5)-N(6)-C(18)-C(13); Cg(2): C(13)-C(14)-C(15)-C(16)-C(17)-C(18); Cg(3): C(1)-C(2)-C(3)-C(4)-C(5)-C(6). |                          |                                             |                             |            |

**Table S4** Selected bond lengths (Å), angles (°) and weak interaction for complex 4

|                                   |                          |                               |                             |            |
|-----------------------------------|--------------------------|-------------------------------|-----------------------------|------------|
| Cu(1)-Cl(1)                       | 2.2311(13)               | Cu(1)-N(1)                    | 1.987(3)                    |            |
| Cu(1)-Cl(2)                       | 2.2064(16)               | Cu(1)-N(4) <sup>i</sup>       | 1.985(3)                    |            |
| Cl(1)-Cu(1)-Cl(2)                 | 156.24(6)                | Cl(2)-Cu(1)-N(1)              | 90.85(10)                   |            |
| Cl(1)-Cu(1)-N(1)                  | 92.90(10)                | Cl(2)-Cu(1)-N(4) <sup>i</sup> | 91.96(10)                   |            |
| Cl(1)-Cu(1)-N(4) <sup>i</sup>     | 93.18(9)                 | N(1)-Cu(1)-N(4) <sup>i</sup>  | 158.19(13)                  |            |
| N(3)-C(7)-C(8)-N(6)               |                          |                               | 63.5(4)                     |            |
| D-H...A                           | d(D-H)                   | d(H...A)                      | d(D...A)                    | ∠(D-H...A) |
| C(7)-H(7B)...Cl(1) <sup>ii</sup>  | 0.97                     | 2.75                          | 3.716(4)                    | 173        |
| C(8)-H(8A)...N(5) <sup>iii</sup>  | 0.97                     | 2.45                          | 3.347(5)                    | 153        |
| π...π Interactions □Face-to-Face□ |                          |                               |                             |            |
| Cg(a)-Cg(b)                       | dihedral angle (a,b) (°) |                               | Ring Centroids Distance (Å) |            |
| Cg(1)-Cg(1) <sup>ii</sup>         | 0.03                     |                               | 3.681(2)                    |            |
| Cg(1)-Cg(2) <sup>ii</sup>         | 3.81                     |                               | 3.916(2)                    |            |
| Cg(2)-Cg(3) <sup>iv</sup>         | 26.66                    |                               | 3.798(3)                    |            |
| Cg(3)-Cg(3) <sup>v</sup>          | 0                        |                               | 3.865(3)                    |            |

Symmetry codes: i)  $x, 1+y, z$ ; ii)  $-x, 2-y, -z$ ; iii)  $1-x, 1-y, -z$ ; iv)  $x, y, z$ ; v)  $1-x, 1-y, 1-z$ ; Ring Cg(1): N(1)–N(2)–N(3)–C(6)–C(1); Ring Cg(2): C(1)–C(2)–C(3)–C(4)–C(5)–C(6); Ring Cg(3): C(9)–C(10)–C(11)–C(12)–C(13)–C(14).

**Table S5** Selected bond lengths (Å), angles (°) and weak interaction for complex **5**

|                                                                                                                                                                                                                                                                                                   |                          |                                 |                             |            |
|---------------------------------------------------------------------------------------------------------------------------------------------------------------------------------------------------------------------------------------------------------------------------------------------------|--------------------------|---------------------------------|-----------------------------|------------|
| Cu(1)-Cl(1)                                                                                                                                                                                                                                                                                       | 2.5334(8)                | Cu(1)-N(1)                      | 2.007(2)                    |            |
| Cu(1)-Cl(2)                                                                                                                                                                                                                                                                                       | 2.2749(9)                | Cu(1)-N(4) <sup>i</sup>         | 2.006(2)                    |            |
| Cu(1)-Cl(1) <sup>i</sup>                                                                                                                                                                                                                                                                          | 2.3782(8)                |                                 |                             |            |
| Cl(1)-Cu(1)-Cl(2)                                                                                                                                                                                                                                                                                 | 117.20(3)                | Cl(1)-Cu(1)-N(4) <sup>i</sup>   | 93.97(7)                    |            |
| Cl(1)-Cu(1)-N(1)                                                                                                                                                                                                                                                                                  | 93.57(7)                 | Cl(1) <sup>i</sup> -Cu(1)-Cl(2) | 152.58(3)                   |            |
| Cl(1)-Cu(1)-Cl(1) <sup>i</sup>                                                                                                                                                                                                                                                                    | 90.19(3)                 | Cl(2)-Cu(1)-N(4) <sup>i</sup>   | 89.13(7)                    |            |
| Cl(2)-Cu(1)-N(1)                                                                                                                                                                                                                                                                                  | 88.80(7)                 | N(1)-Cu(1)-N(4) <sup>i</sup>    | 172.30(10)                  |            |
| Cl(1) <sup>i</sup> -Cu(1)-N(1)                                                                                                                                                                                                                                                                    | 90.73(7)                 | Cu(1)                           | 89.81(3)                    |            |
| Cl(1) <sup>i</sup> -Cu(1)-N(4) <sup>i</sup>                                                                                                                                                                                                                                                       | 87.70(7)                 | -Cl(1)-Cu(1) <sup>i</sup>       |                             |            |
| N(3)-C(7)-C(8)-O(1)                                                                                                                                                                                                                                                                               |                          | 67.4(3)                         |                             |            |
| O(1)-C(9)-C(10)-N(6)                                                                                                                                                                                                                                                                              |                          | -62.0(3)                        |                             |            |
| D-H...A                                                                                                                                                                                                                                                                                           | d(D-H)                   | d(H...A)                        | d(D...A)                    | ∠(D-H...A) |
| C(7)-H(7B)...O(1) <sup>ii</sup>                                                                                                                                                                                                                                                                   | 0.97                     | 2.57                            | 3.524(4)                    | 166        |
| C(10)-H(10B)...N(5) <sup>iii</sup>                                                                                                                                                                                                                                                                | 0.97                     | 2.50                            | 3.423(4)                    | 159        |
| C(14)-H(14)...Cl(1) <sup>iv</sup>                                                                                                                                                                                                                                                                 | 0.93                     | 2.79                            | 3.676(4)                    | 160        |
| C(15)-H(15)...Cl(1) <sup>i</sup>                                                                                                                                                                                                                                                                  | 0.93                     | 2.78                            | 3.407(3)                    | 126        |
| $\pi \cdots \pi$ Interactions □ Face-to-Face □                                                                                                                                                                                                                                                    |                          |                                 |                             |            |
| Cg(a)-Cg(b)                                                                                                                                                                                                                                                                                       | dihedral angle (a,b) (°) |                                 | Ring Centroids Distance (Å) |            |
| Cg(1)-Cg(2) <sup>v</sup>                                                                                                                                                                                                                                                                          | 14.12                    |                                 | 3.9141(15)                  |            |
| Cg(1)-Cg(3) <sup>v</sup>                                                                                                                                                                                                                                                                          | 13.33                    |                                 | 3.8316(17)                  |            |
| Cg(2)-Cg(3) <sup>vi</sup>                                                                                                                                                                                                                                                                         | 0.84                     |                                 | 3.6717(16)                  |            |
| Cg(4)-Cg(4) <sup>vii</sup>                                                                                                                                                                                                                                                                        | 0.03                     |                                 | 3.8546(18)                  |            |
| Cg(3)-Cg(4) <sup>v</sup>                                                                                                                                                                                                                                                                          | 13.79                    |                                 | 3.8375(17)                  |            |
| Cg(3)-Cg(3) <sup>vi</sup>                                                                                                                                                                                                                                                                         | 0                        |                                 | 3.7242(17)                  |            |
| Symmetry codes: i) 2-x, -y, -z; ii) 1-x, 1-y, 1-z; iii) 2-x, 1-y, -z; iv) -1+x, y, z; v) x, y, z; vi) 1-x, 1-y, -z; vii) 1-x, -y, 1-z; Ring Cg(1): N(1)-N(2)-N(3)-C(6)-C(1); Cg(2): N(4)-N(5)-N(6)-C(11)-C(16); Cg(3): C(11)-C(12)-C(13)-C(14)-C(15)-C(16); Cg(4): C(1)-C(2)-C(3)-C(4)-C(5)-C(6). |                          |                                 |                             |            |

**Table S6** Selected bond lengths (Å), angles (°) and weak interaction for complex **6**

|                                                |                          |                   |                             |            |
|------------------------------------------------|--------------------------|-------------------|-----------------------------|------------|
| Cu(1)-Cl(1)                                    | 2.286(3)                 | Cu(2)-Cl(3)       | 2.245(3)                    |            |
| Cu(1)-Cl(2)                                    | 2.4370(19)               | Cu(2)-Cl(4)       | 2.2937(19)                  |            |
| Cu(1)-O(5)                                     | 2.090(7)                 | Cu(2)-O(6)        | 2.340(6)                    |            |
| Cu(1)-N(1)                                     | 1.999(5)                 | Cu(2)-N(6)        | 2.035(6)                    |            |
| Cu(1)-N(12)                                    | 1.997(6)                 | Cu(2)-N(7)        | 2.045(6)                    |            |
| Cl(1)-Cu(1)-Cl(2)                              | 120.12(10)               | Cl(3)-Cu(2)-Cl(4) | 148.29(11)                  |            |
| Cl(1)-Cu(1)-O(5)                               | 144.2(2)                 | Cl(3)-Cu(2)-O(6)  | 103.03(16)                  |            |
| Cl(1)-Cu(1)-N(1)                               | 89.7(2)                  | Cl(3)-Cu(2)-N(6)  | 91.71(19)                   |            |
| Cl(1)-Cu(1)-N(12)                              | 88.8(2)                  | Cl(3)-Cu(2)-N(7)  | 92.5(2)                     |            |
| Cl(2)-Cu(1)-O(5)                               | 95.7(2)                  | Cl(4)-Cu(2)-O(6)  | 108.66(16)                  |            |
| Cl(2)-Cu(1)-N(1)                               | 93.0(2)                  | Cl(4)-Cu(2)-N(6)  | 90.00(19)                   |            |
| Cl(2)-Cu(1)-N(12)                              | 90.7(2)                  | Cl(4)-Cu(2)-N(7)  | 90.76(19)                   |            |
| O(5)-Cu(1)-N(1)                                | 88.3(3)                  | O(6)-Cu(2)-N(6)   | 84.9(2)                     |            |
| O(5)-Cu(1)-N(12)                               | 90.9(3)                  | O(6)-Cu(2)-N(7)   | 86.1(2)                     |            |
| N(1)-Cu(1)-N(12)                               | 176.3(3)                 | N(6)-Cu(2)-N(7)   | 170.7(3)                    |            |
| N(3)-C(7)-C(8)-O(1)                            |                          | -71.0(10)         |                             |            |
| N(9)-C(25)-C(26)-O(3)                          |                          | -68.7(8)          |                             |            |
| O(4)-C(29)-C(30)-N(10)                         |                          | 65.7(7)           |                             |            |
| O(2)-C(11)-C(12)-N(4)                          |                          | 65.4(10)          |                             |            |
| D-H...A                                        | d(D-H)                   | d(H...A)          | d(D...A)                    | ∠(D-H...A) |
| C(7)-H(7B)...Cl(2) <sup>i</sup>                | 0.97                     | 2.70              | 3.523(8)                    | 143        |
| C(11)-H(11B)...Cl(3) <sup>ii</sup>             | 0.97                     | 2.79              | 3.538(10)                   | 134        |
| C(12)-H(12B)...O(2) <sup>i</sup>               | 0.97                     | 2.53              | 3.500(11)                   | 171        |
| C(25)-H(25B)...Cl(2) <sup>i</sup>              | 0.97                     | 2.69              | 3.562(7)                    | 150        |
| C(29)-H(29B)...Cl(3) <sup>ii</sup>             | 0.97                     | 2.77              | 3.560(8)                    | 139        |
| C(30)-H(30A)...Cl(4) <sup>i</sup>              | 0.97                     | 2.78              | 3.667(7)                    | 152        |
| C(37)-H(37)...N(11)                            | 0.93                     | 2.50              | 3.076(14)                   | 120        |
| C(42)-H(42A)...O(6)                            | 0.96                     | 2.45              | 2.817(12)                   | 103        |
| $\pi \cdots \pi$ Interactions □ Face-to-Face □ |                          |                   |                             |            |
| Cg(a)-Cg(b)                                    | dihedral angle (a,b) (°) |                   | Ring Centroids Distance (Å) |            |
| Cg(1)-Cg(5) <sup>iii</sup>                     | 1.14                     |                   | 3.668(5)                    |            |
| Cg(2)-Cg(6) <sup>iii</sup>                     | 0.64                     |                   | 3.840(4)                    |            |
| Cg(3)-Cg(8) <sup>iv</sup>                      | 0.81                     |                   | 3.784(5)                    |            |
| Cg(4)-Cg(7) <sup>iv</sup>                      | 0.20                     |                   | 3.722(5)                    |            |

Symmetry codes: i) x, 1/2-y, -1/2+z; ii) x, 1/2-y, 1/2+z; iii) x, 1/2-y, -1/2+z; iv) 1/2-x, -y, -1/2+z; Ring Cg(1): N(1)-N(2)-N(3)-C(6)-C(1); Ring Cg(2): N(4)-N(5)-N(6)-C(18)-C(13); Ring Cg(3): N(7)-N(8)-N(9)-C(24)-C(19); Ring Cg(4): N(10)-N(11)-N(12)-C(36)-C(31); Ring Cg(5): C(1)-C(2)-C(3)-C(4)-C(5)-C(6); Ring Cg(6): C(13)-C(14)-C(15)-C(16)-C(17)-C(18); Ring Cg(7):



C(19)–C(20)–C(21)–C(22)–C(23)–C(24); Cg(8):  
C(31)–C(32)–C(33)–C(34)–C(35)–C(36).

**Fig. S1** IR of the ligands **L<sup>1</sup>**, **L<sup>2</sup>** and **L<sup>3</sup>**

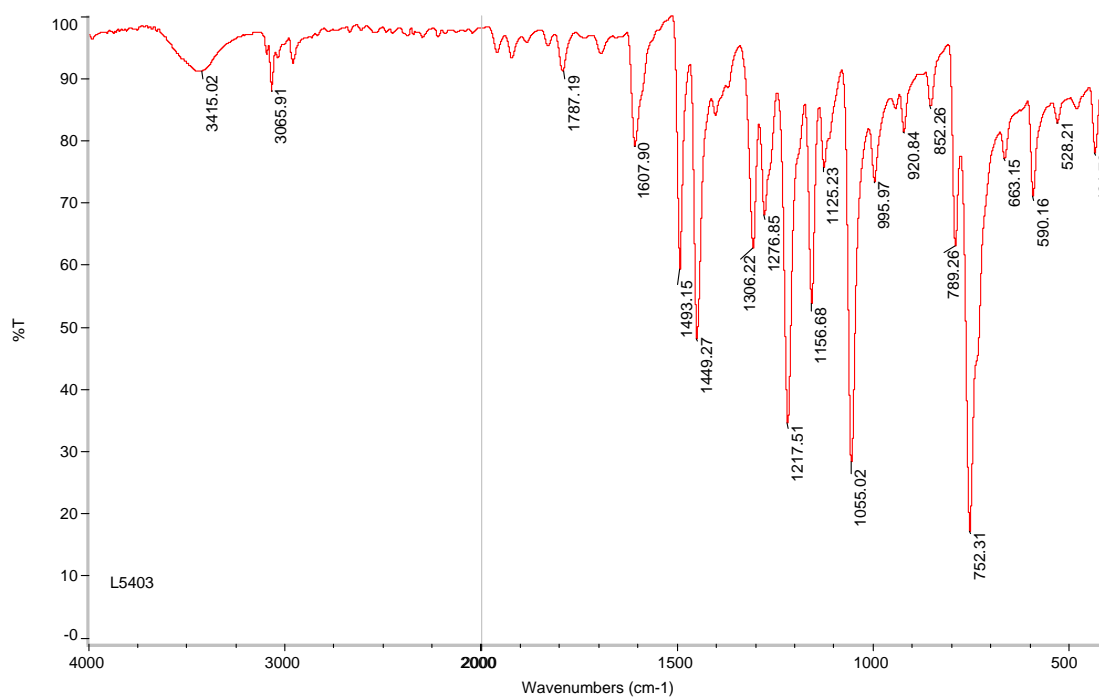

**Ligand L<sup>1</sup>**

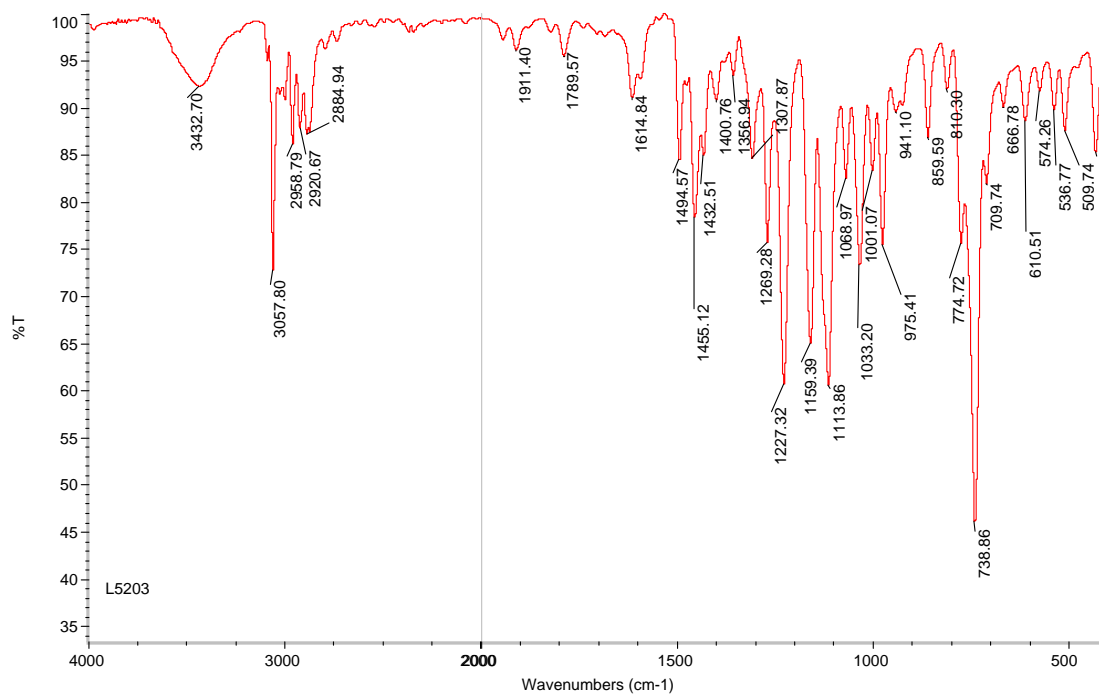

**Ligand L<sup>2</sup>**

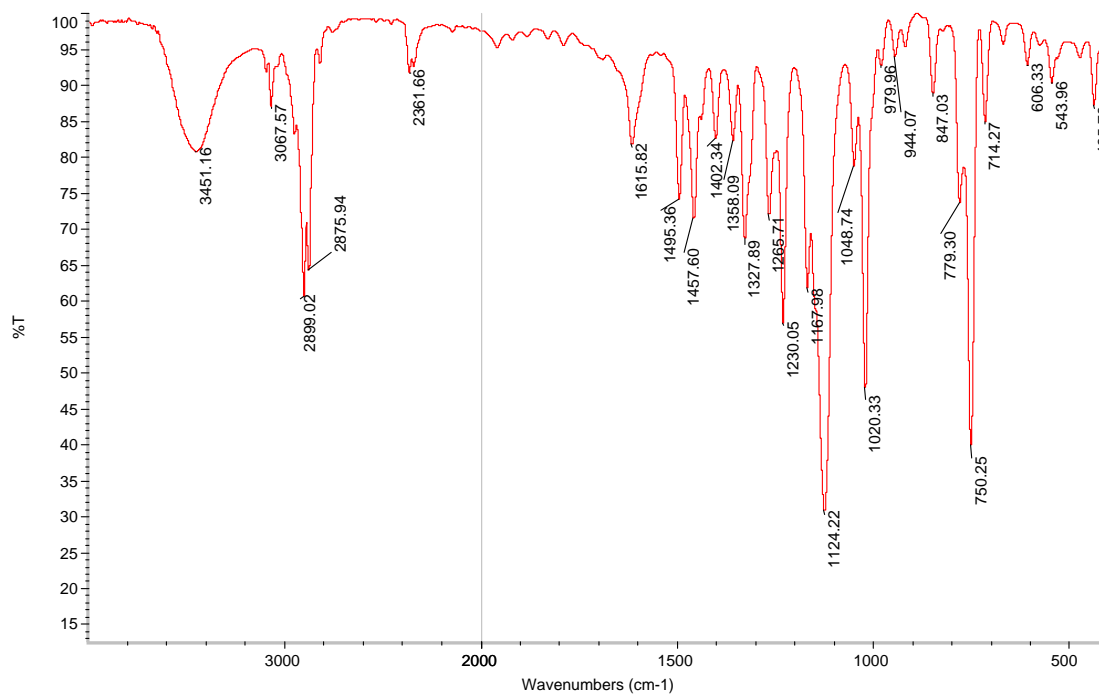

**Ligand L<sup>3</sup>**

**Fig. S2** IR of the complexes **1–6**.

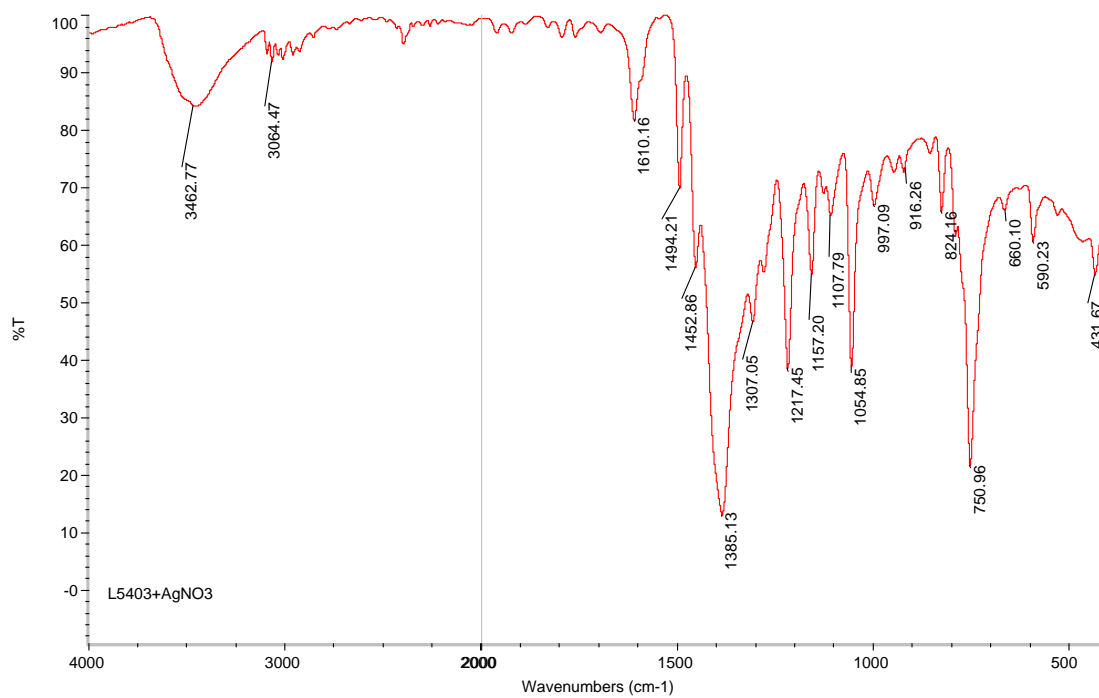

**Complex 1**

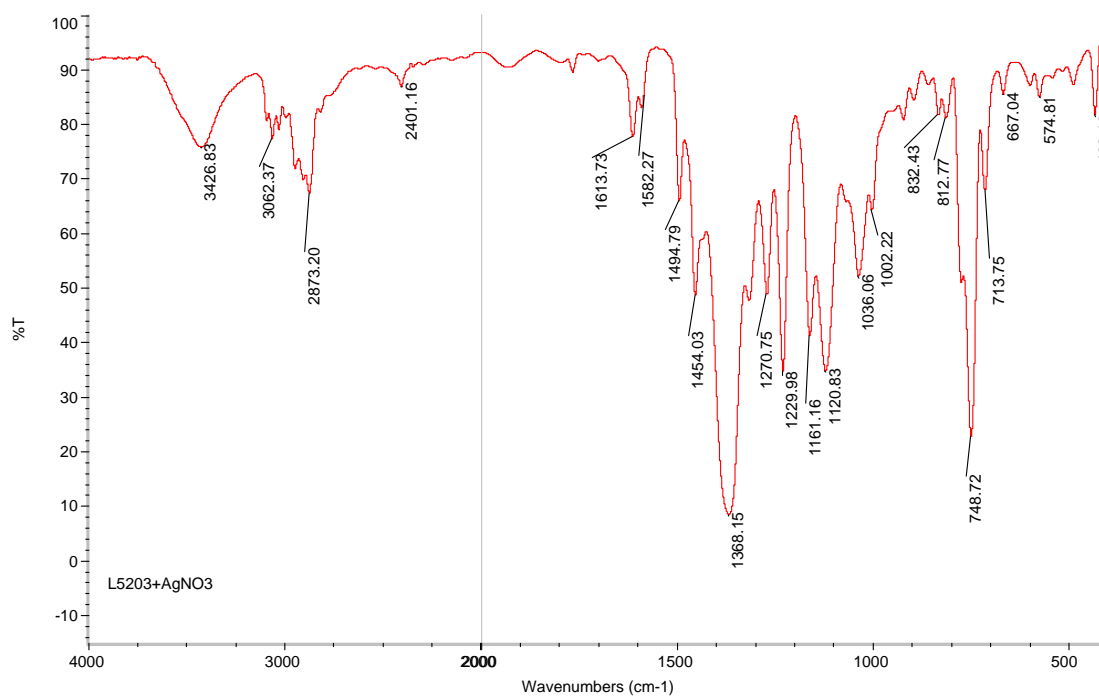

**Complex 2**

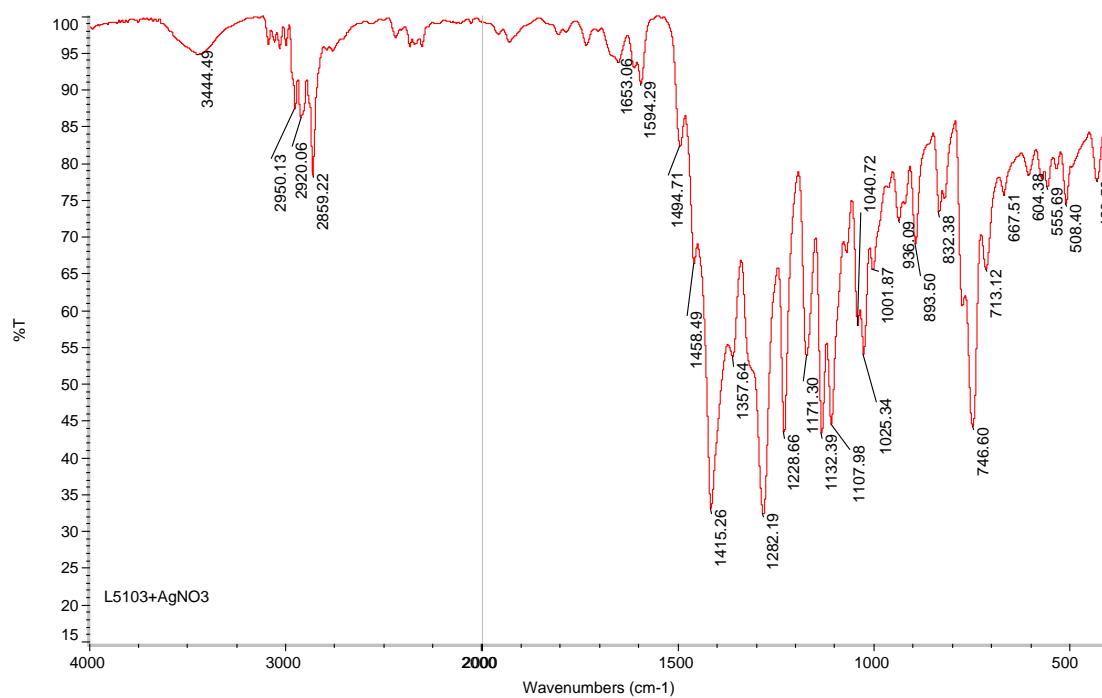

**Complex 3**

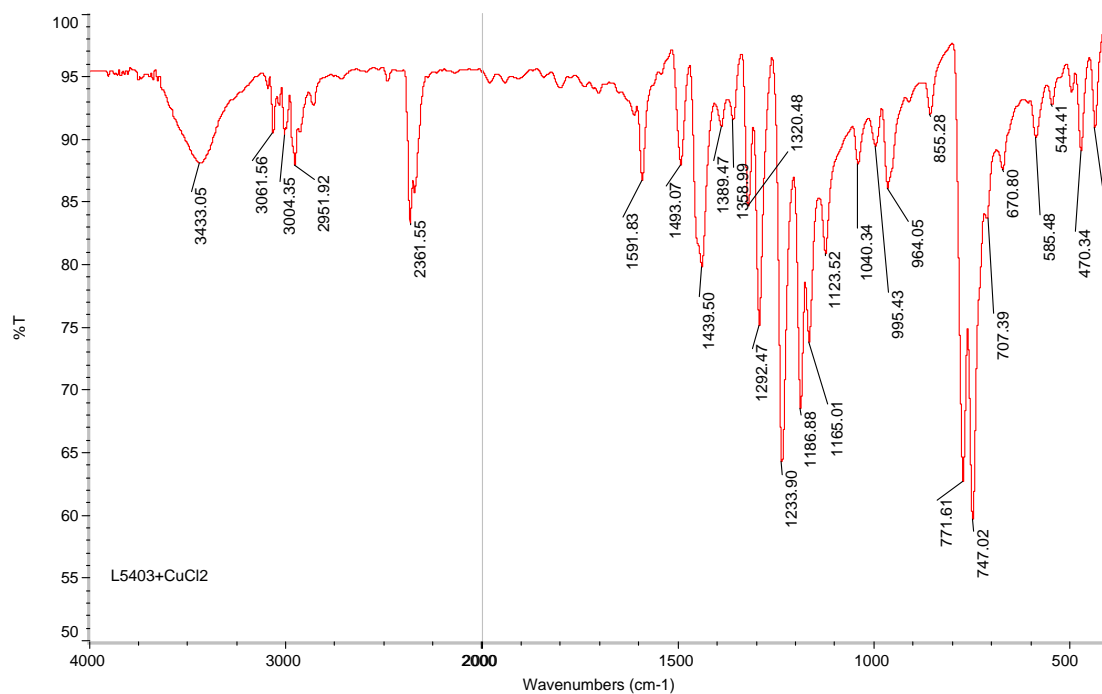

**Complex 4**

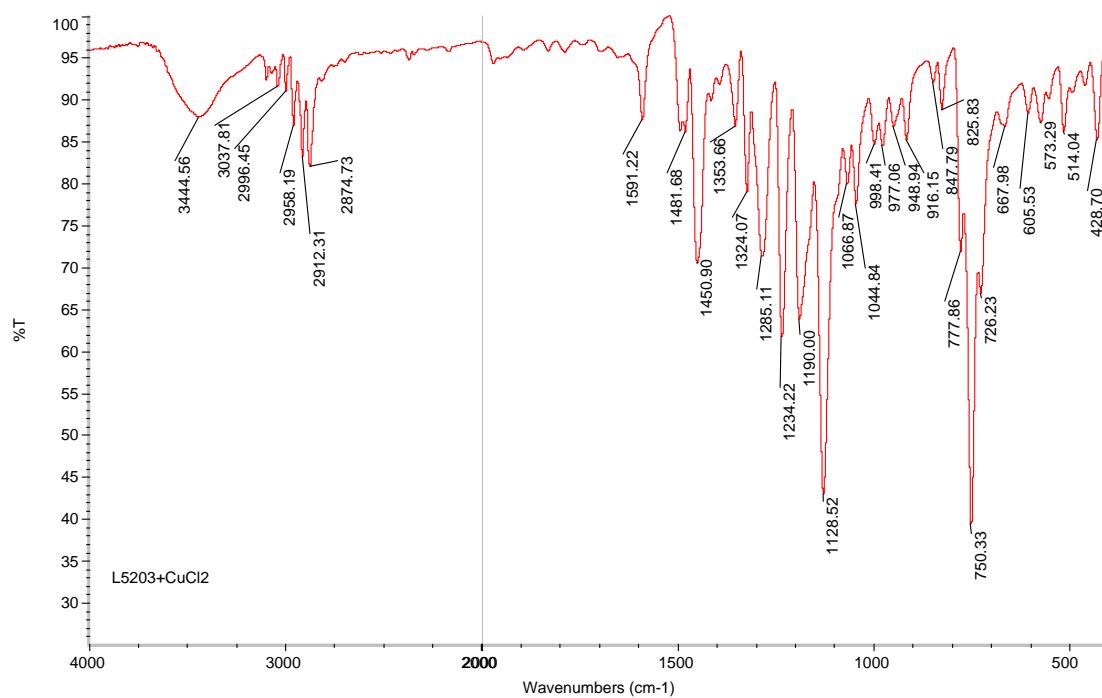

**Complex 5**

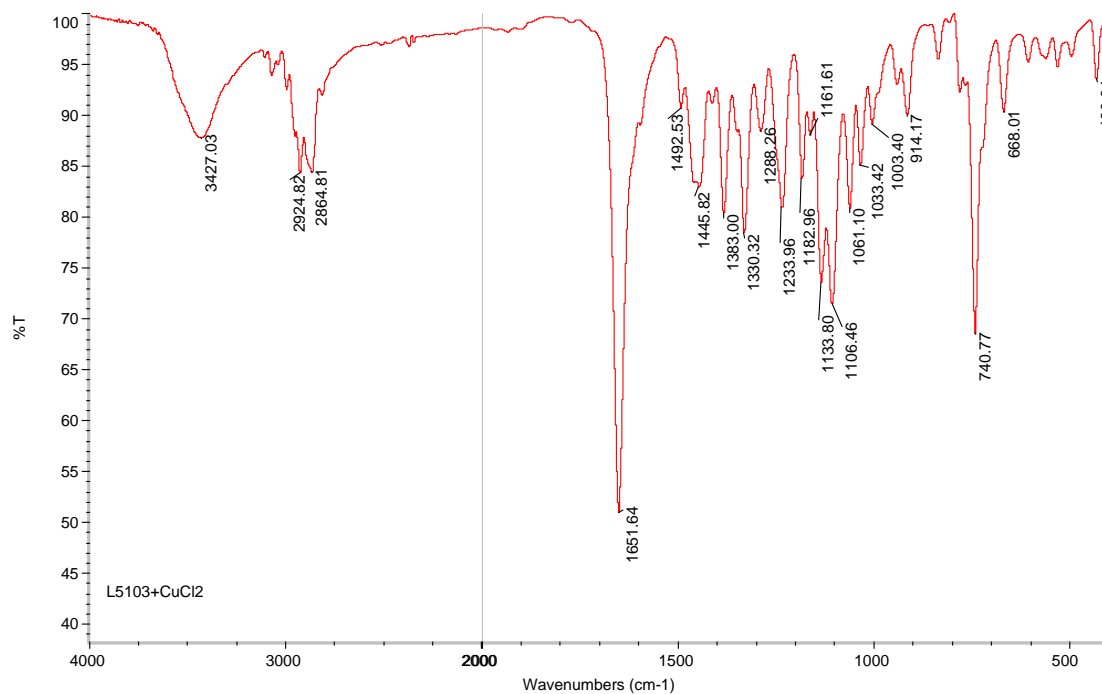

**Complex 6**
